# Supplementary material
Source: PubMed Central journal article supplement (PMC2830845)
Supplement: supp_M900358-MCP200_Supplemental_Information_rebuttal_20091122.pdf [file supp_M900358-MCP200_Supplemental_Information_rebuttal_20091122.pdf]

## Supplemental Information Legends

**Table S1.** Full list of proteins detected by mass spectrometry and X! Tandem with a log(e) value  $\leq -3$  and at least two peptides generated from basal cell protein enrichment of de-roofed PG<sup>+/-</sup> keratinocytes.

**Table S2.** Full list of proteins detected by mass spectrometry and X! Tandem with a log(e) value  $\leq -3$  and at least two peptides generated from basal cell protein enrichment of de-roofed PG<sup>+/-</sup> keratinocytes.

**Fig. S1.** Protein coverage of Integrin  $\beta_4$ . Amino acids detected by mass spectrometry are underlined in red. Peptides designated as theoretically unfavorable for detection by mass spectrometry due to extreme short or long lengths are green. Peptides which are theoretically detectable by mass spectrometry with tryptic digestion are brown.

**Table S3.** Full list of proteins detected by mass spectrometry and X! Tandem with a log(e) value  $\leq -3$  and at least two peptides generated from basal cell protein enrichment of de-roofed CAL33 carcinoma cells.

**Table S4.** Full list of proteins detected by mass spectrometry and X! Tandem with a log(e) value  $\leq -3$  and at least two peptides generated from basal cell protein enrichment of de-roofed UM-SCC-1 carcinoma cells.

**Fig. S2.** Forty proteins are differentially expressed in UM-SCC-1 and CAL33 de-roofed cells. (A) Proteins detected from UM-SCC-1 and CAL33 cells which are differentially detected between the cell types. (B) Proteins detected from UM-SCC-1 and CAL33 cells which are detected with similar spectral counts. (C) Proteins which are primarily detected in UM-SCC-1 cells as opposed to CAL33 cells. (D) Proteins which are primarily detected in CAL33 cells as opposed to UM-SCC-1 cells.

**Table S1.**

PG +/-

| Entry | log(e)  | log(l) | %<br>(measured) | %<br>(corrected) | unique<br>peptides | total<br>peptides | MW<br>(kDa) | Accession          | Protein |
|-------|---------|--------|-----------------|------------------|--------------------|-------------------|-------------|--------------------|---------|
| 1     | -1756   | 6.99   | 36              | 46               | 153                | 192               | 603.9       | IPI00553798        | Ahnak   |
| 2     | -1470.1 | 6.85   | 36              | 45               | 133                | 168               | 517         | IPI00400209        | Plec1   |
| 3     | -946.2  | 6.64   | 25              | 41               | 83                 | 104               | 506.9       | IPI00623114        | Fat1    |
| 4     | -488.4  | 6.53   | 16              | 22               | 46                 | 62                | 330.6       | ENSMUSP00000089703 | Lama3   |
| 5     | -376.9  | 6.5    | 29              | 41               | 37                 | 51                | 194.6       | IPI00313479        | Itgb4   |
| 6     | -381.4  | 6.48   | 31              | 39               | 34                 | 51                | 128.8       | IPI00117093        | Lamb3   |
| 7     | -298.6  | 6.43   | 26              | 36               | 28                 | 38                | 130.3       | IPI00117115        | Lamc2   |
| 8     | -311.4  | 6.28   | 17              | 27               | 28                 | 38                | 272.4       | IPI00113539        | Fn1     |
| 9     | -334.3  | 6.03   | 39              | 53               | 28                 | 38                | 100         | IPI00112963        | Ctnna1  |
| 10    | -188.7  | 6.54   | 41              | 65               | 20                 | 29                | 51.2        | IPI00128040        | Htra1   |

|    |        |      |     |    |    |    |       |             |                    |
|----|--------|------|-----|----|----|----|-------|-------------|--------------------|
| 11 | -222.2 | 6.46 | 51  | 60 | 20 | 31 | 52.8  | IPI00227140 | Krt14              |
| 12 | -245.5 | 6.18 | 26  | 45 | 20 | 27 | 112.9 | IPI00311682 | Atp1a1             |
| 13 | -205.7 | 6.33 | 38  | 64 | 19 | 27 | 61.7  | IPI00139301 | Krt5               |
| 14 | -195   | 6.03 | 26  | 42 | 19 | 26 | 107.3 | IPI00751207 | Ctnnd1             |
| 15 | -189.9 | 5.96 | 20  | 31 | 18 | 21 | 119.5 | IPI00227969 | Itga6              |
| 16 | -156.4 | 5.82 | 11  | 16 | 15 | 18 | 221.7 | IPI00420656 | Tnc                |
| 17 | -149.1 | 5.68 | 21  | 31 | 14 | 16 | 93.1  | IPI00338018 | Postn              |
| 18 | -159.7 | 6.18 | 28  | 42 | 13 | 18 | 59.3  | IPI00131368 | Krt6a              |
| 19 | -134.5 | 5.66 | 23  | 33 | 13 | 16 | 81.7  | IPI00229475 | Jup                |
| 20 | -130.2 | 5.99 | 40  | 50 | 12 | 17 | 38.7  | IPI00468203 | Anxa2              |
| 21 | -122.5 | 5.76 | 29  | 37 | 12 | 16 | 57.1  | IPI00126864 | Angptl2            |
| 22 | -121.1 | 5.65 | 33  | 57 | 11 | 14 | 58.3  | IPI00114641 | Slc3a2             |
| 23 | -138.8 | 5.2  | 6.7 | 9  | 11 | 15 | 301.6 | IPI00131432 | Dst                |
| 24 | -107.2 | 5.64 | 8.6 | 16 | 10 | 10 | 147.9 | IPI00284644 | Col17a1            |
| 25 | -106.3 | 5.53 | 31  | 50 | 9  | 11 | 43.9  | IPI00117689 | Ptrf               |
| 26 | -106.2 | 5.48 | 17  | 32 | 8  | 11 | 98.2  | IPI00318626 | Cdh1               |
| 27 | -57.2  | 5.2  | 8.6 | 11 | 8  | 8  | 129.6 | IPI00118413 | Thbs1              |
| 28 | -60.6  | 5.31 | 9.2 | 14 | 7  | 7  | 117.5 | IPI00222589 | Ptk7               |
| 29 | -59.1  | 5.24 | 12  | 19 | 7  | 7  | 76.7  | IPI00317794 | Ncl                |
| 30 | -51.1  | 5.37 | 8.7 | 13 | 6  | 7  | 134.1 | IPI00230616 | Col alpha-1(XVIII) |
| 31 | -52    | 5.36 | 9.1 | 18 | 6  | 6  | 88.2  | IPI00132474 | Itgb1              |
| 32 | -56.3  | 5.35 | 13  | 22 | 6  | 7  | 105.1 | IPI00263041 | Mmrn2              |
| 33 | -64.6  | 5.29 | 26  | 41 | 6  | 6  | 40.5  | IPI00338854 | Gnai3              |
| 34 | -67.7  | 5.19 | 7.5 | 13 | 6  | 6  | 130.6 | IPI00135324 | Slc12a2            |
| 35 | -75.8  | 5.01 | 12  | 18 | 6  | 7  | 73.1  | IPI00230035 | Ddx3x              |
| 36 | -57.1  | 4.87 | 11  | 19 | 6  | 8  | 113.4 | IPI00648237 | Itga3              |
| 37 | -56.2  | 4.83 | 18  | 26 | 6  | 6  | 49.6  | IPI00117352 | Tubb5              |
| 38 | -37.3  | 5.47 | 26  | 63 | 5  | 6  | 13.7  | IPI00137735 | Rps25              |
| 39 | -40.7  | 5.36 | 23  | 32 | 5  | 6  | 23.5  | IPI00124282 | Rala               |
| 40 | -60.4  | 5.18 | 11  | 19 | 5  | 6  | 69.2  | IPI00420363 | Ddx5               |
| 41 | -46.4  | 5.13 | 6.9 | 9  | 5  | 5  | 85.2  | IPI00311104 | Sema3c             |
| 42 | -47.6  | 4.78 | 16  | 31 | 5  | 8  | 51.4  | IPI00649422 | 3300001P08Rik      |
| 43 | -51.6  | 4.58 | 2.4 | 3  | 5  | 7  | 392.5 | IPI00353420 | Utrn               |
| 44 | -27.6  | 5.66 | 12  | 17 | 4  | 5  | 37.3  | IPI00162780 | Gnb2               |
| 45 | -34.4  | 5.49 | 23  | 44 | 4  | 4  | 19.3  | IPI00129323 | Sfrs3              |
| 46 | -31.2  | 5.32 | 28  | 32 | 4  | 4  | 20.5  | IPI00117829 | Cav1               |
| 47 | -49.3  | 5.31 | 20  | 34 | 4  | 5  | 35    | IPI00115558 | Tacstd1            |
| 48 | -41.5  | 5.1  | 11  | 20 | 4  | 5  | 59.4  | IPI00127763 | Rbm39              |
| 49 | -40    | 5.07 | 12  | 29 | 4  | 4  | 36.2  | IPI00277066 | Hnrpab             |
| 50 | -33.8  | 4.91 | 4.8 | 8  | 4  | 4  | 137.5 | IPI00756424 | Eif5b              |
| 51 | -38.7  | 4.89 | 12  | 18 | 4  | 7  | 42.1  | IPI00228618 | Gnaq               |
| 52 | -38.7  | 4.87 | 9.2 | 14 | 4  | 5  | 85.4  | IPI00125899 | Ctnnb1             |
| 53 | -32.9  | 4.82 | 30  | 46 | 4  | 4  | 21.2  | IPI00315334 | Hras1              |

|    |       |      |     |    |   |   |       |             |           |
|----|-------|------|-----|----|---|---|-------|-------------|-----------|
| 54 | -34.9 | 4.65 | 8.3 | 19 | 4 | 5 | 63.7  | IPI00320636 | Prpf38b   |
| 55 | -53.9 | 4.5  | 4.1 | 6  | 4 | 4 | 226.2 | IPI00123181 | Myh9      |
| 56 | -34.6 | 4.5  | 7   | 14 | 4 | 4 | 98    | IPI00112949 | Trpv4     |
| 57 | -69.4 | 6.02 | 5.8 | 8  | 3 | 5 | 48.1  | IPI00230365 | Krt17     |
| 58 | -67.3 | 5.95 | 14  | 26 | 3 | 3 | 22    | IPI00223714 | Hist1h1e  |
| 59 | -18.2 | 5.52 | 19  | 27 | 3 | 3 | 15.4  | IPI00277753 | Hist1h3a  |
| 60 | -16   | 5.49 | 34  | 62 | 3 | 6 | 14.9  | IPI00133243 | Ifitm3    |
| 61 | -31.6 | 5.46 | 9.9 | 17 | 3 | 4 | 22.6  | IPI00230133 | Hist1h1b  |
| 62 | -35.3 | 5.45 | 16  | 24 | 3 | 3 | 24.1  | IPI00462291 | Hmgb2     |
| 63 | -22   | 5.4  | 22  | 57 | 3 | 6 | 14.1  | IPI00229544 | Hist1h2ab |
| 64 | -17   | 5.24 | 12  | 21 | 3 | 3 | 24.2  | IPI00110370 | Timp3     |
| 65 | -18.3 | 5.1  | 6.5 | 14 | 3 | 3 | 39    | IPI00310880 | Sfrs6     |
| 66 | -22.9 | 5.05 | 12  | 20 | 3 | 3 | 27.7  | IPI00420807 | Sfrs1     |
| 67 | -30   | 4.99 | 16  | 22 | 3 | 5 | 23.7  | IPI00331128 | Rab8a     |
| 68 | -21.5 | 4.84 | 32  | 51 | 3 | 3 | 21.9  | IPI00850934 |           |
| 69 | -23.1 | 4.83 | 13  | 16 | 3 | 3 | 42.6  | IPI00410836 | Fen1      |
| 70 | -29.6 | 4.8  | 7.8 | 11 | 3 | 3 | 62.6  | IPI00406117 | Syncrip   |
| 71 | -24.5 | 4.8  | 24  | 28 | 3 | 5 | 20.5  | IPI00138716 | Rap2b     |
| 72 | -9    | 4.77 | 5.2 | 9  | 3 | 4 | 90.6  | IPI00109340 | Cdh3      |
| 73 | -27.7 | 4.73 | 6.3 | 11 | 3 | 4 | 75.4  | IPI00129430 | Sfpq      |
| 74 | -29   | 4.71 | 3.7 | 5  | 3 | 3 | 165   | IPI00461384 | Pxdn      |
| 75 | -28.2 | 4.71 | 4.6 | 7  | 3 | 3 | 93.5  | IPI00120691 | Ddx21     |
| 76 | -12.8 | 4.17 | 3.5 | 5  | 3 | 4 | 172.7 | IPI00122223 | Top2a     |
| 77 | -16.4 | 4.02 | 3.6 | 5  | 3 | 3 | 151.9 | IPI00331361 | Mybbp1a   |
| 78 | -21.8 | 3.62 | 2.6 | 3  | 3 | 3 | 203.6 | IPI00321646 | Al314180  |
| 79 | -9.4  | 5.3  | 10  | 18 | 2 | 2 | 23.4  | IPI00127408 | Rac1      |
| 80 | -41.8 | 5.29 | 8.5 | 13 | 2 | 2 | 40.5  | IPI00228617 | Gnai2     |
| 81 | -5.3  | 5.29 | 26  | 37 | 2 | 4 | 11.2  | IPI00222555 | S100a10   |
| 82 | -31.5 | 5.21 | 2.5 | 4  | 2 | 2 | 121.4 | IPI00416906 | Gnas      |
| 83 | -24.2 | 5.19 | 10  | 19 | 2 | 2 | 27.4  | IPI00153743 | Sfrs7     |
| 84 | -12.7 | 5.14 | 30  | 64 | 2 | 2 | 8.2   | IPI00138302 | Rpl38     |
| 85 | -13   | 5.11 | 17  | 32 | 2 | 2 | 14.5  | IPI00123007 | Rpl31     |
| 86 | -61.8 | 5.06 | 4   | 6  | 2 | 2 | 105.2 | IPI00119870 | Ctnna2    |
| 87 | -23.4 | 5    | 5.5 | 19 | 2 | 2 | 55.8  | IPI00129395 | Slc7a5    |
| 88 | -19.1 | 4.99 | 7.4 | 21 | 2 | 3 | 67    | IPI00121634 | Slc7a1    |
| 89 | -17.7 | 4.93 | 15  | 23 | 2 | 2 | 14.8  | IPI00113394 |           |
| 90 | -9.5  | 4.92 | 7.7 | 16 | 2 | 2 | 25.5  | IPI00121135 | Sfrs2     |
| 91 | -14.6 | 4.88 | 2.8 | 6  | 2 | 2 | 85.8  | IPI00266154 | Cd44      |
| 92 | -10.5 | 4.81 | 7.8 | 19 | 2 | 2 | 51.6  | IPI00320420 | Clu       |
| 93 | -7.4  | 4.8  | 12  | 18 | 2 | 2 | 27.8  | IPI00318548 | U2af1     |
| 94 | -10.3 | 4.77 | 5.4 | 9  | 2 | 2 | 43.9  | IPI00410804 | Luc7l     |
| 95 | -38.3 | 4.76 | 5.6 | 8  | 2 | 2 | 41.5  | IPI00132361 | Gna14     |
| 96 | -16   | 4.75 | 22  | 32 | 2 | 2 | 23    | IPI00128522 | Hspb1     |

|     |       |      |     |    |   |   |       |             |         |
|-----|-------|------|-----|----|---|---|-------|-------------|---------|
| 97  | -14.4 | 4.74 | 6.6 | 8  | 2 | 2 | 41.3  | IPI00857127 | Eif4a2  |
| 98  | -15.7 | 4.67 | 2.6 | 4  | 2 | 2 | 80.8  | IPI00124111 | Pkp1    |
| 99  | -17.6 | 4.56 | 3.9 | 7  | 2 | 3 | 87.9  | IPI00458583 | Hnrnpu  |
| 100 | -17.3 | 4.54 | 19  | 38 | 2 | 2 | 15.4  | IPI00402981 | Rps24   |
| 101 | -17   | 4.52 | 8.5 | 15 | 2 | 2 | 31.4  | IPI00311236 | Rpl7    |
| 102 | -15.5 | 4.47 | 0.7 | 1  | 2 | 3 | 468.7 | IPI00515360 | Hspg2   |
| 103 | -12   | 4.39 | 3   | 5  | 2 | 2 | 101.3 | IPI00756879 | Dsg3    |
| 104 | -10.8 | 4.38 | 9.1 | 13 | 2 | 2 | 29.8  | IPI00679159 |         |
| 105 | -18.5 | 4.37 | 7.6 | 13 | 2 | 2 | 43    | IPI00318017 | Prss23  |
| 106 | -16.8 | 4.37 | 14  | 17 | 2 | 2 | 26.7  | IPI00134599 | Rps3    |
| 107 | -21.7 | 4.35 | 10  | 17 | 2 | 2 | 33.5  | IPI00313222 | Rpl6    |
| 108 | -11.9 | 4.34 | 12  | 13 | 2 | 2 | 19.7  | IPI00128491 | Aprt    |
| 109 | -11.7 | 4.33 | 7.4 | 17 | 2 | 2 | 32.6  | IPI00377298 | Tra2a   |
| 110 | -11.7 | 4.32 | 2.5 | 4  | 2 | 2 | 108.8 | IPI00129220 | Epha2   |
| 111 | -17.7 | 4.24 | 7.6 | 11 | 2 | 3 | 40.3  | IPI00652811 | Anxa1   |
| 112 | -12.3 | 4.23 | 10  | 13 | 2 | 4 | 34.3  | IPI00165694 | Tomm34  |
| 113 | -14.1 | 4.22 | 1.6 | 3  | 2 | 3 | 206.1 | IPI00405742 | Plxnb2  |
| 114 | -21.5 | 4.11 | 1.4 | 2  | 2 | 3 | 295.1 | IPI00134652 | Col7a1  |
| 115 | -19.9 | 4.11 | 3.4 | 5  | 2 | 2 | 145.9 | IPI00311780 | Abcb1a  |
| 116 | -11.6 | 4.04 | 2.7 | 4  | 2 | 3 | 121.9 | IPI00467172 | Myo1c   |
| 117 | -10.7 | 4.01 | 3.7 | 5  | 2 | 2 | 134.1 | IPI00453819 | Lars    |
| 118 | -14.3 | 3.98 | 3.9 | 9  | 2 | 2 | 127.1 | IPI00664442 | Slc4a7  |
| 119 | -10.3 | 3.97 | 2.2 | 3  | 2 | 2 | 162.1 | IPI00457485 |         |
| 120 | -13.7 | 3.94 | 0.9 | 1  | 2 | 3 | 531.7 | IPI00119876 | Dync1h1 |
| 121 | -11.1 | 3.94 | 2.9 | 5  | 2 | 2 | 134.2 | IPI00606586 | Smc2    |
| 122 | -10.5 | 3.74 | 9.7 | 16 | 2 | 2 | 51.9  | IPI00226149 | Rsl1d1  |
| 123 | -14.2 | 3.73 | 6.9 | 10 | 2 | 2 | 74.6  | IPI00316133 | Srp72   |
| 124 | -16.2 | 3.66 | 4.5 | 6  | 2 | 2 | 107.6 | IPI00108780 | Ap2a1   |

**Table S2.**

PG -/-

| <u>Entry</u> | <u>log(e)</u> | <u>log(l)</u> | <u>%<br/>(measured)</u> | <u>%<br/>(corrected)</u> | <u>unique<br/>peptides</u> | <u>total<br/>peptides</u> | <u>MW<br/>(kDa)</u> | <u>Accession</u>   | <u>Protein</u> |
|--------------|---------------|---------------|-------------------------|--------------------------|----------------------------|---------------------------|---------------------|--------------------|----------------|
| 1            | -1599         | 6.89          | 32                      | 41                       | 144                        | 182                       | 603.9               | IPI00553798        | Ahnak          |
| 2            | -581.7        | 6.11          | 17                      | 28                       | 53                         | 58                        | 506.9               | IPI00623114        | Fat1           |
| 3            | -540.2        | 6.55          | 16                      | 21                       | 48                         | 65                        | 330.6               | ENSMUSP00000089703 | Lama3          |
| 4            | -440.9        | 6.5           | 34                      | 43                       | 36                         | 62                        | 128.8               | IPI00117093        | Lamb3          |
| 5            | -335          | 6.54          | 60                      | 71                       | 31                         | 52                        | 52.8                | IPI00227140        | Krt14          |
| 6            | -317.2        | 6.43          | 27                      | 38                       | 30                         | 41                        | 130.3               | IPI00117115        | Lamc2          |
| 7            | -265.7        | 6.29          | 44                      | 74                       | 27                         | 35                        | 61.7                | IPI00139301        | Krt5           |
| 8            | -245          | 6.68          | 46                      | 73                       | 24                         | 41                        | 51.2                | IPI00128040        | Htra1          |
| 9            | -217.3        | 5.87          | 20                      | 29                       | 23                         | 24                        | 194.6               | IPI00313479        | Itgb4          |

|    |        |      |     |     |    |    |       |             |                    |
|----|--------|------|-----|-----|----|----|-------|-------------|--------------------|
| 10 | -248.8 | 6.33 | 35  | 53  | 20 | 32 | 59.3  | IPI00131368 | Krt6a              |
| 11 | -235.1 | 5.65 | 34  | 46  | 20 | 24 | 100   | IPI00112963 | Ctnna1             |
| 12 | -143.1 | 5.93 | 42  | 53  | 14 | 18 | 38.7  | IPI00468203 | Anxa2              |
| 13 | -115.5 | 5.58 | 13  | 16  | 13 | 16 | 129.6 | IPI00118413 | Thbs1              |
| 14 | -125   | 5.56 | 18  | 25  | 12 | 15 | 85.2  | IPI00311104 | Sema3c             |
| 15 | -97.6  | 5.39 | 14  | 23  | 10 | 12 | 76.7  | IPI00317794 | Ncl                |
| 16 | -88.6  | 5.36 | 12  | 19  | 10 | 10 | 122.1 | IPI00420835 | Itga6              |
| 17 | -88.5  | 5.42 | 15  | 23  | 10 | 11 | 96.8  | IPI00750243 | Ctnnd1             |
| 18 | -88.7  | 5.21 | 27  | 40  | 9  | 11 | 49.6  | IPI00117352 | Tubb5              |
| 19 | -164.7 | 6.07 | 20  | 26  | 8  | 11 | 48.1  | IPI00230365 | Krt17              |
| 20 | -91.2  | 5.09 | 12  | 21  | 8  | 9  | 112.9 | IPI00311682 | Atp1a1             |
| 21 | -71    | 5.1  | 21  | 29  | 8  | 9  | 38.7  | IPI00230395 | Anxa1              |
| 22 | -66.9  | 4.89 | 3   | 4   | 8  | 10 | 521.6 | IPI00230061 | Plec1              |
| 23 | -67.2  | 4.88 | 5.2 | 7   | 7  | 8  | 233.2 | IPI00464223 | Fer1l3             |
| 24 | -59.4  | 5    | 9.7 | 14  | 7  | 9  | 134.1 | IPI00230616 | Col alpha-1(XVIII) |
| 25 | -63.6  | 5    | 13  | 23  | 6  | 8  | 98.2  | IPI00318626 | Cdh1               |
| 26 | -62.1  | 5.22 | 16  | 21  | 6  | 7  | 57.1  | IPI00126864 | Angptl2            |
| 27 | -61.7  | 5.19 | 8.6 | 15  | 6  | 8  | 101.3 | IPI00756879 | Dsg3               |
| 28 | -55.6  | 5.07 | 25  | 30  | 6  | 6  | 41.5  | IPI00114945 | 2-Sep              |
| 29 | -53.6  | 5.27 | 36  | 54  | 6  | 6  | 23.3  | IPI00121110 | Ralb               |
| 30 | -62.6  | 4.79 | 10  | 16  | 5  | 6  | 73.1  | IPI00230035 | Ddx3x              |
| 31 | -52.4  | 4.95 | 20  | 33  | 5  | 7  | 43.9  | IPI00117689 | Ptrf               |
| 32 | -48.8  | 4.82 | 17  | 29  | 5  | 5  | 58.3  | IPI00114641 | Slc3a2             |
| 33 | -46.4  | 4.77 | 10  | 15  | 5  | 5  | 85.4  | IPI00125899 | Ctnnb1             |
| 34 | -44.7  | 5.03 | 14  | 35  | 5  | 5  | 51.6  | IPI00320420 | Clu                |
| 35 | -44.2  | 5.01 | 8.1 | 16  | 5  | 5  | 88.2  | IPI00132474 | Itgb1              |
| 36 | -14.8  | 5.46 | 25  | 100 | 5  | 7  | 28    | IPI00120793 | Prnd               |
| 37 | -49.5  | 4.75 | 3.5 | 5   | 4  | 6  | 226.2 | IPI00123181 | Myh9               |
| 38 | -47.8  | 5.54 | 21  | 32  | 4  | 4  | 24.1  | IPI00462291 | Hmgb2              |
| 39 | -46.5  | 5.09 | 5.3 | 8   | 4  | 4  | 137.5 | IPI00756424 | Eif5b              |
| 40 | -45.3  | 5.26 | 20  | 34  | 4  | 6  | 35    | IPI00115558 | Tacstd1            |
| 41 | -40.4  | 4.98 | 12  | 29  | 4  | 4  | 36.2  | IPI00277066 | Hnrpab             |
| 42 | -38.4  | 5.3  | 13  | 20  | 4  | 5  | 40.5  | IPI00228617 | Gnai2              |
| 43 | -35.4  | 4.99 | 16  | 20  | 4  | 6  | 42.6  | IPI00410836 | Fen1               |
| 44 | -31.7  | 5.19 | 12  | 17  | 4  | 4  | 37.3  | IPI00162780 | Gnb2               |
| 45 | -31.5  | 4.36 | 12  | 25  | 4  | 6  | 51.4  | IPI00649422 | 3300001P08Rik      |
| 46 | -31.2  | 5.25 | 23  | 44  | 4  | 4  | 19.3  | IPI00129323 | Sfrs3              |
| 47 | -31.1  | 5.18 | 33  | 49  | 4  | 4  | 23    | IPI00128522 | Hspb1              |
| 48 | -25.7  | 4.8  | 32  | 52  | 4  | 4  | 21.9  | IPI00850934 |                    |
| 49 | -24.5  | 5.49 | 24  | 33  | 4  | 4  | 15.4  | IPI00277753 | Hist1h3a           |
| 50 | -87    | 5.06 | 13  | 19  | 3  | 4  | 49.6  | IPI00109073 | Tubb4              |
| 51 | -35.8  | 4.6  | 6.7 | 12  | 3  | 3  | 75.4  | IPI00129430 | Sfpq               |
| 52 | -34.1  | 4.98 | 35  | 45  | 3  | 3  | 11.6  | IPI00133621 | S100a14            |

|    |       |      |     |    |   |   |       |                    |          |
|----|-------|------|-----|----|---|---|-------|--------------------|----------|
| 53 | -32.9 | 4.66 | 7.5 | 14 | 3 | 3 | 59.4  | IPI00127763        | Rbm39    |
| 54 | -31.7 | 4.22 | 9.9 | 14 | 3 | 4 | 54.5  | IPI00353563        | Fscn1    |
| 55 | -27.4 | 4.76 | 9.9 | 13 | 3 | 3 | 41.3  | IPI00857127        | Eif4a2   |
| 56 | -27.3 | 4.34 | 12  | 18 | 3 | 4 | 42    | IPI00121387        | Gna11    |
| 57 | -26.9 | 5.31 | 34  | 62 | 3 | 4 | 14.9  | IPI00133243        | Ifitm3   |
| 58 | -26.6 | 5.44 | 42  | 61 | 3 | 8 | 11.2  | IPI00222555        | S100a10  |
| 59 | -26.3 | 4.96 | 22  | 33 | 3 | 3 | 14.8  | IPI00113394        |          |
| 60 | -25.9 | 4.64 | 4.5 | 7  | 3 | 3 | 80.8  | IPI00124111        | Pkp1     |
| 61 | -25.6 | 5.09 | 22  | 50 | 3 | 4 | 13.6  | ENSMUSP00000089302 | Hist3h2a |
| 62 | -24.8 | 3.95 | 6.5 | 9  | 3 | 3 | 75.6  | IPI00315488        | Rars     |
| 63 | -23.6 | 5.11 | 7.7 | 14 | 3 | 4 | 46.6  | IPI00380309        | Luc7l2   |
| 64 | -23   | 4.31 | 5.4 | 9  | 3 | 4 | 105.1 | IPI00263041        | Mmrn2    |
| 65 | -22.7 | 4.47 | 3.8 | 7  | 3 | 3 | 113.4 | IPI00648237        | Itga3    |
| 66 | -20.2 | 4.8  | 8.3 | 12 | 3 | 3 | 29.8  | IPI00473521        |          |
| 67 | -19.2 | 5.2  | 3.7 | 8  | 3 | 3 | 85.8  | IPI00266154        | Cd44     |
| 68 | -76.6 | 6.12 | 5.3 | 6  | 2 | 2 | 52.1  | IPI00131209        | Krt16    |
| 69 | -31.5 | 4.57 | 10  | 17 | 2 | 5 | 33.5  | IPI00313222        | Rpl6     |
| 70 | -25.3 | 4.59 | 11  | 23 | 2 | 3 | 23.5  | IPI00133185        | Rpl14    |
| 71 | -25.3 | 4.29 | 7.6 | 13 | 2 | 2 | 43    | IPI00318017        | Prss23   |
| 72 | -25   | 4    | 16  | 43 | 2 | 3 | 36.2  | IPI00461966        | BC056923 |
| 73 | -21.4 | 5.43 | 6.3 | 9  | 2 | 5 | 37.8  | IPI00322594        | Ctgf     |
| 74 | -19.1 | 4.72 | 8.5 | 12 | 2 | 3 | 31.7  | IPI00754697        |          |
| 75 | -19.1 | 4.4  | 19  | 38 | 2 | 2 | 15.4  | IPI00402981        | Rps24    |
| 76 | -18.9 | 4.44 | 2   | 3  | 2 | 2 | 117.5 | IPI00222589        | Ptk7     |
| 77 | -18.9 | 3.69 | 4.7 | 7  | 2 | 2 | 104   | IPI00310131        | Ap2a2    |
| 78 | -18.1 | 4.83 | 14  | 35 | 2 | 3 | 13.7  | IPI00137735        | Rps25    |
| 79 | -18   | 4.47 | 14  | 17 | 2 | 2 | 26.7  | IPI00134599        | Rps3     |
| 80 | -17.6 | 4.38 | 2.6 | 4  | 2 | 2 | 93.4  | IPI00230665        | Ncam1    |
| 81 | -15.7 | 3.74 | 3.6 | 5  | 2 | 2 | 93.5  | IPI00120691        | Ddx21    |
| 82 | -15.5 | 4.67 | 18  | 23 | 2 | 2 | 16.7  | IPI00462232        |          |
| 83 | -15.3 | 5.14 | 18  | 23 | 2 | 2 | 14.3  | IPI00109409        | S100a16  |
| 84 | -15.1 | 4.84 | 12  | 16 | 2 | 2 | 28.3  | IPI00415609        | Fgfbp1   |
| 85 | -15   | 3.93 | 10  | 13 | 2 | 2 | 34.3  | IPI00165694        | Tomm34   |
| 86 | -14.4 | 4.63 | 8.6 | 9  | 2 | 3 | 22.3  | IPI00126388        | Cldn4    |
| 87 | -14.4 | 4.4  | 4.3 | 6  | 2 | 2 | 62.6  | IPI00406117        | Syncrip  |
| 88 | -14.3 | 4.25 | 4.9 | 7  | 2 | 2 | 100.1 | IPI00624693        |          |
| 89 | -14   | 4.75 | 23  | 35 | 2 | 2 | 13.5  | IPI00119220        | Snrpd2   |
| 90 | -14   | 3.63 | 3.4 | 5  | 2 | 2 | 145.9 | IPI00311780        | Abcb1a   |
| 91 | -13.9 | 3.45 | 2.4 | 3  | 2 | 2 | 108.8 | IPI00129220        | Epha2    |
| 92 | -13.8 | 4.18 | 15  | 31 | 2 | 2 | 16.5  | IPI00153608        | Eif1a    |
| 93 | -13.7 | 4.3  | 11  | 14 | 2 | 3 | 20.7  | IPI00466588        | Rap2c    |
| 94 | -13.6 | 4.89 | 9.4 | 16 | 2 | 2 | 22.6  | IPI00230133        | Hist1h1b |
| 95 | -13.2 | 4.02 | 5   | 10 | 2 | 2 | 58.8  | IPI00224075        | Cpne1    |

|     |       |      |     |    |   |   |       |             |        |
|-----|-------|------|-----|----|---|---|-------|-------------|--------|
| 96  | -12.9 | 4.89 | 30  | 64 | 2 | 2 | 8.2   | IPI00138302 | Rpl38  |
| 97  | -12.7 | 4.75 | 19  | 34 | 2 | 2 | 13    | IPI00261455 | Rps26  |
| 98  | -12.5 | 4.43 | 8.3 | 11 | 2 | 2 | 64    | IPI00653643 | Hnrnp1 |
| 99  | -12.2 | 4.09 | 4.7 | 6  | 2 | 3 | 94.9  | IPI00396671 | Abcf1  |
| 100 | -12   | 5.14 | 10  | 18 | 2 | 2 | 23.4  | IPI00127408 | Rac1   |
| 101 | -11.5 | 4.2  | 4   | 6  | 2 | 3 | 112.4 | IPI00321990 |        |
| 102 | -11.3 | 4.57 | 7.3 | 12 | 2 | 2 | 27.7  | IPI00420807 | Sfrs1  |
| 103 | -11   | 5.03 | 1.5 | 2  | 2 | 2 | 172.7 | IPI00122223 | Top2a  |
| 104 | -10.9 | 4.19 | 6.2 | 7  | 2 | 2 | 48.2  | IPI00129102 | Plau   |
| 105 | -10.9 | 4.12 | 2.8 | 4  | 2 | 3 | 188.6 | IPI00467447 | Iqgap1 |
| 106 | -10.7 | 5.57 | 12  | 12 | 2 | 4 | 15.7  | IPI00316491 | Hbb-b1 |
| 107 | -10.6 | 4.48 | 7.5 | 10 | 2 | 2 | 31.2  | IPI00318492 | Rps2   |
| 108 | -9.7  | 4.45 | 6.6 | 10 | 2 | 2 | 38.1  | IPI00480398 |        |
| 109 | -9    | 3.49 | 1.2 | 2  | 2 | 2 | 292.8 | IPI00457499 | Gcn11  |
| 110 | -8.9  | 3.4  | 13  | 15 | 2 | 2 | 19.7  | IPI00128491 | Aprt   |
| 111 | -4.1  | 4.34 | 12  | 18 | 2 | 2 | 27.8  | IPI00318548 | U2af1  |

Figure S1.

1 MAGPCCSPWVKLLLLAAMLASASLPGDLANRCKKAQVKSCTECIRVDKSCAYCTDELFKER 60  
61 RCNTQAELLAAGCRGESILVMESSLEITENTQIDTSLHRSQVSPQGLQVRLRPGEERSFV 120  
121 FQVFEPLESPVDLYILMDFSNSMSDDLNLKQMGONLAKILRQLTSDYTIGFGKFVDKVS 180  
181 VPQTDMRPEKLKEPWPNSDPPFSFKNVISLTENVEEFWNKLQGERISGNLDAPEGGFDAI 240  
241 LQTAVCTRDIGWRADSTHLLVFSTESAFHYEADGANVLAGIMNRNDEKCHLDASGAYTQY 300  
301 KTDQYPSVPTLVRLLAKHNIPIFAVTNYSYSYEEKLHKYFPVSSLGVLQEDSSNIVELL 360  
361 EEAFYRIRSNLDIRALDSPRGLRTEVTSDTLQKTETGTFHIKRGEVGTYNVHLRAVEDID 420  
421 GTHVCQLAKEDQGGNIHLKPSFSDGLRMIDASVICDVCPELQKEVRSARCHFRGDFMCGH 480  
481 CVCNEGWSGKTCNCSTGSLSDTQPCLREGEDKPCSGHGECQCGRVCYGEGRYEGHFCEY 540  
541 DNFQCPRTSGFLCNDRGRCSMGECVCEPGWTGRSCDCPLSNATCIDSNGGICNGRGYCEC 600  
601 GRCHCNQQSLYTDTTCEINYSAIRLGLCEDLRSCVQCQAWGTGEKKGRACDDCPFKVMV 660  
661 DELKKAEEVVEYCSFRDEDDDDCTYSYNVEGDGSPGPNSTVLVHKKKDCPPGSFWWLIPLL 720  
721 IFLLLLLLALLLLLCKWYCACCKACLGLLPCCNRGMVGFKEDHYMLRENLMASDHLDTPM 780  
781 LRSGNLKGRDTRVRWKITNNVQRPGFATHAASTSPTLVPYGLSLRLGRLCTENLMKPGTR 840  
841 ECDQLRQVEEENLNEVYRQVSGAHKLQQTFRQQPNTGKKQDHTIVDTVLLAPRSAKQML 900  
901 LKLTTEKQVEQGSFHELKVAPGYTVAEQDARGMVEFQEGVELVDVRVPLFIRPEDDDEK 960  
961 QLLVEAIDVPVGTATLGRRLVNITIIKEQASGVVSFEQPEYSVSRGDQVARIPVIRHILD 1020  
1021 NGKSQVSYSTQDNTAHGHRDYVPVEGELLFHPGETWKELQVKLLELQEVDSLLRGRQVRR 1080  
1081 FQVQLSNPKFGARLGQPSTTTTIVILGEHDETDRLINQTLSSPPPHGDLGAPQNPNAKAA 1140  
1141 GSRKIHFNLWPPPCKPMGYRVKYWIQGDSESEAHLLDSKVPSVELTNLYPYCDYEMKVCA 1200  
1201 YGAQGEQPYSSLVSCRTHQVPSPEGRLAFNVVSSVTVQLSWAEPATNGEITAYEVCY 1260  
1261 LVNEDNRPIGPMKQVLVDNPNRMLLIENLRESQPYRYTVKARNGAGWGPPEREAIINLAT 1320  
1321 QPKRPMSIPIIPDIPIVDAQGGEDYENFLMYSDVLRSPASSQRPSVSDDEHLVNGRMD 1380  
1381 FAYPGSANSLHRMTAANVAYGTHLSPHLSHRVLSTSSTLTRDYHSLTRTEHSHSGTLPRD 1440  
1441 YSTLTSLSSSQDSRGAVGVPDTPTRLVFSALGPTSLKVSQEPQCDRMLLGYSVEYQLLNG 1500  
1501 GEMHRLNIIPNPGQTSVVVEDLLPNHSYVFRVRAQSQEGWGREREGVITIESSQVHPQSPLC 1560  
1561 PLPGSAFTLSTPSAGPLVFTALSPDSLQLSWERPRRPNGDILGYLVTCEMAQGGAPART 1620  
1621 FRVDGDNPESRLVTPGLSENVYKFKVQARTTEFGPEREGITIESSQVGGFPQLGSHS 1680  
1681 GLFQNPVQSEFSSVTSTHSTTTTEPFLMDGLTLGTQRLEAGGSLTRHVTQEFVTRTLTASG 1740  
1741 SLSTHMDQQFFQT

**Table S3.****UM-SCC1**

| <b>Entry</b> | <b>log(e)</b> | <b>log(l)</b> | <b>%<br/>(measured)</b> | <b>%<br/>(corrected)</b> | <b>unique<br/>peptides</b> | <b>total<br/>peptides</b> | <b>MW<br/>(kDa)</b> | <b>Accession</b> | <b>Protein</b> |
|--------------|---------------|---------------|-------------------------|--------------------------|----------------------------|---------------------------|---------------------|------------------|----------------|
| 1            | -223.4        | 6.03          | 25                      | 35                       | 20                         | 55                        | 108.1               | Q76M96           | CCDC80         |
| 2            | -193.4        | 6.53          | 6.9                     | 13                       | 2                          | 7                         | 50.1                | Q90835           |                |
| 3            | -155.6        | 5.62          | 16                      | 22                       | 15                         | 34                        | 129.5               | Q13751           | LAMB3          |
| 4            | -145.3        | 5.5           | 7.1                     | 9                        | 16                         | 25                        | 366.4               | Q16787           | LAMA3          |
| 5            | -133.4        | 6.17          | 6.9                     | 11                       | 2                          | 3                         | 50.1                | IPI00180730      |                |
| 6            | -131.5        | 5.61          | 13                      | 20                       | 14                         | 26                        | 130.9               | Q13753           | LAMC2          |
| 7            | -99.4         | 5.41          | 28                      | 53                       | 11                         | 16                        | 59.3                | Q14498           | RBM39          |
| 8            | -90.5         | 6.53          | 8.5                     | 16                       | 2                          | 4                         | 24.3                | IPI00561747      |                |
| 9            | -80.5         | 5.55          | 29                      | 46                       | 9                          | 19                        | 51.3                | Q92743           | HTRA1          |
| 10           | -76.1         | 5.47          | 33                      | 53                       | 9                          | 16                        | 27.7                | Q07955           | SFRS1          |
| 11           | -75.7         | 5.78          | 40                      | 66                       | 8                          | 19                        | 14.8                | P35268           | RPL22          |
| 12           | -74.2         | 5.5           | 28                      | 45                       | 8                          | 19                        | 32.7                | Q02878           | RPL6           |
| 13           | -71.8         | 5.62          | 36                      | 100                      | 7                          | 16                        | 16.3                | P62263           | RPS14          |
| 14           | -71.2         | 4.89          | 15                      | 24                       | 8                          | 12                        | 76.6                | P19338           | NCL            |
| 15           | -68.7         | 5.56          | 61                      | 100                      | 7                          | 24                        | 14.6                | P37108           | SRP14          |
| 16           | -67.1         | 5.23          | 13                      | 17                       | 7                          | 15                        | 74.6                | Q15582           | TGFBI          |
| 17           | -66.9         | 5.17          | 47                      | 85                       | 8                          | 12                        | 21.8                | ENSP00000384755  |                |
| 18           | -65.1         | 5.75          | 26                      | 35                       | 7                          | 15                        | 29.6                | P12272           | PTHLH          |
| 19           | -63.6         | 5.49          | 29                      | 42                       | 8                          | 17                        | 17.2                | P62277           | RPS13          |
| 20           | -63           | 5.91          | 23                      | 30                       | 8                          | 19                        | 26.2                | Q14512           | FGFBP1         |
| 21           | -62.8         | 5.23          | 55                      | 70                       | 8                          | 16                        | 14.4                | P53999           | SUB1           |
| 22           | -61.8         | 5.34          | 22                      | 31                       | 7                          | 14                        | 29.9                | P61247           | RPS3A          |
| 23           | -61           | 5.4           | 14                      | 25                       | 6                          | 15                        | 46.5                | Q9Y383           | LUC7L2         |
| 24           | -59.9         | 5.57          | 38                      | 53                       | 6                          | 18                        | 14.2                | P84103           | SFRS3          |
| 25           | -59.2         | 5.78          | 36                      | 87                       | 8                          | 27                        | 13.7                | P62851           | RPS25          |
| 26           | -59           | 5.36          | 41                      | 63                       | 6                          | 21                        | 22.1                | P62081           | RPS7           |
| 27           | -57.5         | 5.27          | 23                      | 27                       | 7                          | 15                        | 36.7                | P00338           | LDHA           |
| 28           | -57           | 5.53          | 22                      | 32                       | 6                          | 14                        | 31.7                | P17936           | IGFBP3         |
| 29           | -55.4         | 5.36          | 20                      | 35                       | 6                          | 15                        | 42                  | IPI00581140      |                |
| 30           | -53.5         | 4.82          | 9.6                     | 13                       | 6                          | 10                        | 85.2                | Q99985           | SEMA3C         |
| 31           | -52           | 5.02          | 6.4                     | 9                        | 5                          | 11                        | 113                 | P09874           | PARP1          |
| 32           | -51.3         | 5.75          | 38                      | 85                       | 7                          | 17                        | 17.7                | P62750           | RPL23A         |
| 33           | -49.1         | 5.49          | 49                      | 100                      | 6                          | 13                        | 8.2                 | P63173           | RPL38          |
| 34           | -48.6         | 6.07          | 33                      | 78                       | 6                          | 16                        | 14                  | ENSP00000373730  | H2AFJ          |
| 35           | -48.5         | 6.01          | 13                      | 35                       | 2                          | 5                         | 14.1                | P28001           | HIST1H2AE      |
| 36           | -48.2         | 5.62          | 14                      | 16                       | 7                          | 18                        | 42                  | O00622           | CYR61          |



|    |       |      |     |     |   |    |       |                 |          |
|----|-------|------|-----|-----|---|----|-------|-----------------|----------|
| 37 | -44.1 | 5.62 | 32  | 100 | 8 | 18 | 27.6  | P04156          | PRNP     |
| 38 | -43.3 | 5.09 | 12  | 19  | 5 | 10 | 48    | P35659          | DEK      |
| 39 | -43   | 5.56 | 17  | 32  | 5 | 8  | 23    | O15347          | HMGB3    |
| 40 | -42.6 | 4.84 | 19  | 27  | 6 | 9  | 46.8  | P05455          | SSB      |
| 41 | -41.8 | 5.11 | 27  | 32  | 5 | 9  | 26.7  | P23396          | RPS3     |
| 42 | -41.4 | 5.85 | 42  | 71  | 5 | 11 | 11.7  | P17096          | HMGA1    |
| 43 | -39.9 | 5.05 | 14  | 19  | 4 | 7  | 33.6  | P07910          |          |
| 44 | -39.2 | 5.62 | 31  | 91  | 5 | 13 | 7.1   | Q9Y2S6          |          |
| 45 | -39.1 | 5.57 | 25  | 36  | 5 | 11 | 25    | P62906          | RPL10A   |
| 46 | -39   | 5.27 | 17  | 29  | 4 | 8  | 30    | P62424          | RPL7A    |
| 47 | -38.5 | 5.93 | 20  | 38  | 2 | 5  | 15.1  | P16104          | H2AFX    |
| 48 | -36.6 | 5.38 | 20  | 53  | 4 | 7  | 23.5  | P84098          | RPL19    |
| 49 | -36.3 | 5    | 8.4 | 14  | 5 | 10 | 47.7  | P36578          | RPL4     |
| 50 | -36.3 | 5.37 | 36  | 49  | 4 | 10 | 14.8  | P62244          | RPS15A   |
| 51 | -35   | 5.07 | 9.4 | 18  | 5 | 9  | 90.7  | ENSP00000384201 |          |
| 52 | -35   | 5.45 | 25  | 45  | 4 | 7  | 13.4  | P60866          | RPS20    |
| 53 | -34.9 | 4.93 | 9   | 20  | 4 | 9  | 64.4  | Q5VTL8          | PRPF38B  |
| 54 | -34.8 | 4.9  | 16  | 25  | 4 | 9  | 34.5  | Q15785          | TOMM34   |
| 55 | -34.3 | 5.19 | 17  | 26  | 5 | 9  | 34.3  | P46777          | RPL5     |
| 56 | -33.4 | 5.38 | 10  | 18  | 5 | 9  | 46.4  | Q9GZT5          | WNT10A   |
| 57 | -32.6 | 4.81 | 7.5 | 12  | 4 | 6  | 62.3  | P13647          | KRT5     |
| 58 | -32.4 | 5.16 | 18  | 29  | 4 | 7  | 19.1  | P62266          | RPS23    |
| 59 | -29.3 | 5.45 | 27  | 40  | 4 | 10 | 17.8  | P30050          | RPL12    |
| 60 | -28.9 | 4.82 | 5.5 | 8   | 4 | 7  | 83.2  | P08238          | HSP90AB1 |
| 61 | -28.4 | 6.03 | 24  | 33  | 4 | 11 | 15.3  | P84243          |          |
| 62 | -27.9 | 4.83 | 6.5 | 9   | 4 | 6  | 87    | Q9Y446          | PKP3     |
| 63 | -27.6 | 4.77 | 15  | 21  | 4 | 6  | 29.6  | P62701          | RPS4X    |
| 64 | -26.7 | 4.46 | 13  | 19  | 4 | 7  | 61.5  | Q13573          | SNW1     |
| 65 | -26.7 | 4.49 | 7.1 | 12  | 3 | 4  | 102.3 | Q8IYB3          | SRRM1    |
| 66 | -26.4 | 4.49 | 13  | 27  | 4 | 6  | 51.4  | O95232          |          |
| 67 | -26   | 5.02 | 15  | 20  | 4 | 7  | 25.2  | Q00688          | FKBP3    |
| 68 | -25.7 | 5.11 | 10  | 19  | 2 | 4  | 27.4  | Q16629          | SFRS7    |
| 69 | -25.5 | 5.27 | 15  | 36  | 3 | 8  | 20.9  | P07305          | H1F0     |
| 70 | -24.8 | 4.74 | 22  | 33  | 4 | 5  | 17.7  | P62269          | RPS18    |
| 71 | -24.7 | 4.23 | 13  | 17  | 4 | 6  | 31.3  | P15880          | RPS2     |
| 72 | -23.6 | 4.81 | 11  | 22  | 3 | 6  | 32.8  | Q14103          | HNRPD    |
| 73 | -23.5 | 4.73 | 10  | 13  | 3 | 4  | 45.2  | P04075          | ALDOA    |
| 74 | -23.4 | 5.9  | 23  | 63  | 2 | 6  | 13.5  | Q71UI9          | H2AFV    |
| 75 | -21.7 | 4.7  | 5.4 | 9   | 3 | 4  | 69.1  | P17844          | DDX5     |
| 76 | -21.3 | 5.06 | 26  | 48  | 3 | 6  | 14.5  | P62899          | RPL31    |
| 77 | -20.9 | 5.47 | 16  | 59  | 3 | 6  | 17.7  | P47914          | RPL29    |
| 78 | -20.8 | 4.65 | 16  | 29  | 3 | 5  | 25.2  | P62241          | RPS8     |
| 79 | -20.7 | 5.08 | 30  | 45  | 3 | 6  | 13.5  | P62316          | SNRPD2   |

|     |       |      |     |    |   |   |      |                 |         |
|-----|-------|------|-----|----|---|---|------|-----------------|---------|
| 80  | -20.6 | 4.43 | 9.3 | 12 | 3 | 5 | 40.5 | Q9Y295          | DRG1    |
| 81  | -20.3 | 5.29 | 15  | 25 | 3 | 7 | 24.1 | P35625          | TIMP3   |
| 82  | -20.3 | 4.29 | 9.6 | 19 | 3 | 5 | 54.9 | O76021          | RSL1D1  |
| 83  | -20.2 | 4.75 | 15  | 23 | 3 | 5 | 34.9 | Q96AG4          | LRRC59  |
| 84  | -20.2 | 4.3  | 10  | 15 | 3 | 6 | 49.6 | P04350          | TUBB4   |
| 85  | -19.2 | 5.14 | 23  | 30 | 2 | 8 | 11.7 | Q9UDP3          | S100A11 |
| 86  | -19   | 4.64 | 19  | 38 | 2 | 6 | 15.1 | P62847          | RPS24   |
| 87  | -18.9 | 4.84 | 0.7 | 1  | 3 | 5 | 399  | O15230          | LAMA5   |
| 88  | -18.6 | 4.06 | 22  | 37 | 2 | 2 | 15.5 | P08708          |         |
| 89  | -18.1 | 4.85 | 11  | 16 | 2 | 4 | 39.5 | O75367          | H2AFY   |
| 90  | -17.7 | 4.77 | 9.4 | 17 | 2 | 4 | 22.5 | Q92522          | H1FX    |
| 91  | -17.6 | 4.81 | 15  | 21 | 3 | 5 | 16.1 | P39019          | RPS19   |
| 92  | -17.1 | 4.81 | 13  | 20 | 3 | 5 | 28.7 | Q9Y3A5          | SBDS    |
| 93  | -17.1 | 4.75 | 2   | 3  | 2 | 4 | 81   | Q08945          | SSRP1   |
| 94  | -16.7 | 5.04 | 26  | 33 | 2 | 6 | 9.5  | P42677          |         |
| 95  | -16   | 4.74 | 31  | 40 | 2 | 6 | 13.8 | Q9Y237          | PIN4    |
| 96  | -15.8 | 5.06 | 7   | 14 | 3 | 4 | 33.2 | Q9NWB6          |         |
| 97  | -15.6 | 4.12 | 4.2 | 6  | 2 | 3 | 61.8 | P08195          | SLC3A2  |
| 98  | -15.3 | 5.33 | 6.6 | 9  | 2 | 6 | 39   | O00755          | WNT7A   |
| 99  | -15.2 | 5.02 | 9.7 | 12 | 2 | 8 | 12.6 | P62888          | RPL30   |
| 100 | -15.1 | 4.04 | 5.4 | 6  | 2 | 4 | 63.1 | P06744          | GPI     |
| 101 | -15   | 4.34 | 4.2 | 8  | 2 | 4 | 90.5 | Q00839          | HNRNPU  |
| 102 | -14.9 | 5.09 | 9.8 | 12 | 2 | 5 | 20.2 | P63241          | EIF5A   |
| 103 | -14.1 | 4.83 | 15  | 19 | 2 | 4 | 27.5 | Q9UKD2          | MRTO4   |
| 104 | -13.7 | 4.46 | 14  | 24 | 2 | 4 | 22.2 | O75494          | FUSIP1  |
| 105 | -13.7 | 4.73 | 12  | 25 | 2 | 5 | 17.8 | P83731          | RPL24   |
| 106 | -13.5 | 5.01 | 12  | 22 | 2 | 4 | 20.2 | P62913          | RPL11   |
| 107 | -13.3 | 4.69 | 8.2 | 10 | 2 | 4 | 35.5 | P27695          | APEX1   |
| 108 | -13   | 4.2  | 5.5 | 8  | 2 | 2 | 44.9 | P18754          | RCC1    |
| 109 | -12.2 | 3.97 | 4   | 6  | 2 | 3 | 87.3 | Q9NR30          | DDX21   |
| 110 | -12   | 4.09 | 14  | 20 | 2 | 3 | 20.6 | P61204          | ARF3    |
| 111 | -11.9 | 4.77 | 14  | 20 | 2 | 3 | 16.4 | O60869          | EDF1    |
| 112 | -11.4 | 4.98 | 17  | 57 | 2 | 4 | 14.5 | P42766          | RPL35   |
| 113 | -11.2 | 4.8  | 8.3 | 22 | 2 | 3 | 14.4 | P35544          | FAU     |
| 114 | -11.1 | 3.55 | 6.4 | 9  | 2 | 2 | 45.1 | Q9H0S4          | DDX47   |
| 115 | -11.1 | 4.83 | 15  | 21 | 2 | 4 | 18   | ENSP00000383981 |         |
| 116 | -10.8 | 4.56 | 3.3 | 6  | 2 | 4 | 88.4 | P05556          | ITGB1   |
| 117 | -10.7 | 4.64 | 8.1 | 10 | 2 | 3 | 33.8 | P22087          | FBL     |
| 118 | -10.7 | 4.69 | 13  | 40 | 2 | 4 | 18.8 | Q8WVK2          |         |
| 119 | -10.5 | 3.77 | 5.1 | 7  | 2 | 2 | 70.7 | Q9UHB9          | SRP68   |
| 120 | -10.3 | 3.74 | 13  | 16 | 2 | 4 | 19.9 | P46783          | RPS10   |
| 121 | -10.1 | 4.34 | 17  | 22 | 2 | 3 | 32.4 | O00560          | SDCBP   |
| 122 | -10   | 4.85 | 9.7 | 14 | 2 | 3 | 28   | P62917          | RPL8    |

|     |      |      |     |    |   |   |      |                 |        |
|-----|------|------|-----|----|---|---|------|-----------------|--------|
| 123 | -9.8 | 4.47 | 27  | 52 | 2 | 4 | 10.8 | P62304          | SNRPE  |
| 124 | -9.7 | 4.75 | 9.6 | 15 | 2 | 5 | 37.3 | O60911          | CTSL2  |
| 125 | -9.7 | 4.37 | 12  | 18 | 2 | 4 | 27.9 | Q01081          | U2AF1  |
| 126 | -9.5 | 4.16 | 6.4 | 9  | 2 | 2 | 42.3 | P38159          | RBMX   |
| 127 | -9.4 | 4.39 | 20  | 34 | 2 | 2 | 14.7 | IPI00187975     |        |
| 128 | -9.2 | 4.37 | 4.4 | 5  | 2 | 2 | 61.1 | P11940          | PABPC1 |
| 129 | -9.1 | 4.64 | 11  | 22 | 2 | 4 | 15.8 | P61353          | RPL27  |
| 130 | -8.8 | 4.93 | 16  | 30 | 2 | 3 | 23.8 | ENSP00000351380 |        |
| 131 | -8.3 | 4.91 | 17  | 31 | 2 | 3 | 13   | P62854          |        |
| 132 | -8.2 | 4.99 | 8   | 22 | 2 | 3 | 28.7 | P62753          | RPS6   |
| 133 | -6.8 | 4.76 | 27  | 67 | 2 | 2 | 6.9  | Q9NX55          | SERF2  |
| 134 | -6.5 | 4.86 | 7.6 | 18 | 2 | 4 | 17.2 | P61254          | RPL26  |

**Table S4.**

**CAL33**

| <u>Entry</u> | <u>log(e)</u> | <u>log(l)</u> | <u>%<br/>(measured)</u> | <u>%<br/>(corrected)</u> | <u>unique<br/>peptides</u> | <u>total<br/>peptides</u> | <u>MW<br/>(kDa)</u> | <u>Accession</u> | <u>Protein</u> |
|--------------|---------------|---------------|-------------------------|--------------------------|----------------------------|---------------------------|---------------------|------------------|----------------|
| 1            | -578          | 6.16          | 13                      | 17                       | 54                         | 101                       | 628.7               | Q09666           | AHNAK          |
| 2            | -410.6        | 6.41          | 34                      | 49                       | 36                         | 104                       | 108.1               | Q76M96           | CCDC80         |
| 3            | -356.7        | 5.65          | 10                      | 13                       | 33                         | 50                        | 515.9               | Q15149           | PLEC1          |
| 4            | -320.4        | 6.02          | 30                      | 58                       | 27                         | 66                        | 112.8               | P05023           | ATP1A1         |
| 5            | -241.1        | 5.96          | 21                      | 28                       | 20                         | 57                        | 129.5               | Q13751           | LAMB3          |
| 6            | -216.9        | 5.81          | 8.5                     | 11                       | 19                         | 35                        | 366.4               | Q16787           | LAMA3          |
| 7            | -209.7        | 5.98          | 32                      | 46                       | 18                         | 42                        | 61.8                | P08195           | SLC3A2         |
| 8            | -198.6        | 5.86          | 47                      | 59                       | 18                         | 42                        | 38.6                | P07355           | ANXA2          |
| 9            | -189.7        | 5.91          | 18                      | 28                       | 18                         | 35                        | 130.9               | Q13753           | LAMC2          |
| 10           | -179.3        | 5.57          | 15                      | 22                       | 18                         | 30                        | 200.6               | P16144           | ITGB4          |
| 11           | -164          | 6.34          | 6.9                     | 13                       | 2                          | 2                         | 50.1                | IPI00589985      |                |
| 12           | -141.6        | 5.61          | 44                      | 59                       | 13                         | 31                        | 38.7                | P04083           | ANXA1          |
| 13           | -130.1        | 5.52          | 29                      | 39                       | 13                         | 29                        | 66                  | O00567           | NOL5A          |
| 14           | -118.9        | 5.38          | 22                      | 32                       | 12                         | 20                        | 87                  | Q9Y446           | PKP3           |
| 15           | -108.1        | 5.36          | 21                      | 30                       | 11                         | 20                        | 81.7                | P14923           | JUP            |
| 16           | -99.1         | 5.94          | 4.6                     | 8                        | 2                          | 3                         | 21.9                | P10412           | HIST1H1E       |
| 17           | -97.9         | 5.59          | 18                      | 30                       | 10                         | 16                        | 62.3                | P13647           | KRT5           |
| 18           | -84.6         | 5.37          | 20                      | 22                       | 8                          | 13                        | 63.9                | ENSP00000352447  | C1orf116       |
| 19           | -79.5         | 5.01          | 14                      | 19                       | 9                          | 16                        | 100                 | P35221           | CTNNA1         |
| 20           | -70.5         | 5.15          | 20                      | 39                       | 7                          | 14                        | 59.3                | Q14498           | RBM39          |
| 21           | -66.2         | 5.55          | 17                      | 30                       | 7                          | 17                        | 46.5                | Q9Y383           | LUC7L2         |
| 22           | -66.1         | 5.77          | 35                      | 100                      | 6                          | 18                        | 16.3                | P62263           | RPS14          |
| 23           | -64.8         | 5.43          | 41                      | 63                       | 6                          | 25                        | 22.1                | P62081           | RPS7           |
| 24           | -64.5         | 5.58          | 47                      | 100                      | 8                          | 14                        | 17.7                | P62750           | RPL23A         |
| 25           | -62.5         | 5.75          | 49                      | 100                      | 7                          | 21                        | 8.2                 | P63173           | RPL38          |

|    |       |      |     |     |   |    |       |                 |         |
|----|-------|------|-----|-----|---|----|-------|-----------------|---------|
| 26 | -59.3 | 5.84 | 23  | 30  | 7 | 28 | 26.2  | Q14512          | FGFBP1  |
| 27 | -58.7 | 5.37 | 18  | 30  | 5 | 19 | 43    | O95084          | PRSS23  |
| 28 | -57.8 | 5.6  | 38  | 53  | 6 | 16 | 14.2  | P84103          | SFRS3   |
| 29 | -56   | 5.1  | 8.3 | 12  | 5 | 9  | 126.5 | P23229          | ITGA6   |
| 30 | -54.8 | 5.38 | 17  | 24  | 6 | 13 | 29.9  | P61247          | RPS3A   |
| 31 | -53   | 5.45 | 34  | 48  | 7 | 15 | 17.2  | P62277          | RPS13   |
| 32 | -51.3 | 5.26 | 23  | 36  | 6 | 16 | 32.7  | Q02878          | RPL6    |
| 33 | -50.6 | 5.43 | 34  | 81  | 7 | 14 | 13.7  | P62851          | RPS25   |
| 34 | -50.6 | 5.34 | 11  | 23  | 6 | 9  | 54    | P11166          | SLC2A1  |
| 35 | -49.2 | 6.02 | 31  | 91  | 6 | 15 | 7.1   | IPI00006378     |         |
| 36 | -49.1 | 5.17 | 6.7 | 11  | 2 | 2  | 42    | IPI00581140     |         |
| 37 | -48.5 | 4.39 | 9   | 13  | 6 | 8  | 117.8 | O00159          | MYO1C   |
| 38 | -47.5 | 4.91 | 11  | 26  | 6 | 8  | 64.4  | Q5VTL8          | PRPF38B |
| 39 | -47.4 | 4.99 | 24  | 40  | 5 | 10 | 31.7  | P27105          | STOM    |
| 40 | -46.9 | 5.09 | 16  | 24  | 6 | 10 | 61.5  | Q13573          | SNW1    |
| 41 | -46.5 | 4.71 | 6.1 | 9   | 4 | 7  | 113   | P09874          | PARP1   |
| 42 | -46.2 | 5.66 | 12  | 13  | 6 | 16 | 42    | O00622          | CYR61   |
| 43 | -44.5 | 4.97 | 13  | 21  | 4 | 9  | 38.4  | ENSP00000313422 | ARL6IP4 |
| 44 | -44.3 | 4.79 | 45  | 82  | 5 | 9  | 21.8  | ENSP00000384755 |         |
| 45 | -42   | 4.74 | 17  | 26  | 4 | 5  | 39.5  | O75367          | H2AFY   |
| 46 | -41.2 | 5.13 | 9.9 | 20  | 6 | 9  | 88.4  | P05556          | ITGB1   |
| 47 | -40.4 | 4.64 | 9.5 | 13  | 5 | 10 | 116   | P06756          | ITGAV   |
| 48 | -40.1 | 5.06 | 33  | 80  | 6 | 7  | 17.2  | P61254          | RPL26   |
| 49 | -39.7 | 5.22 | 51  | 71  | 4 | 8  | 11.8  | Q96FQ6          | S100A16 |
| 50 | -39.4 | 5    | 25  | 34  | 5 | 9  | 16.1  | P39019          | RPS19   |
| 51 | -38.3 | 4.96 | 17  | 20  | 5 | 7  | 46.5  | P00966          | ASS1    |
| 52 | -37.7 | 5.08 | 1.8 | 3   | 5 | 8  | 399   | O15230          | LAMA5   |
| 53 | -37   | 4.81 | 18  | 23  | 5 | 9  | 31.3  | P15880          | RPS2    |
| 54 | -37   | 5.1  | 36  | 49  | 4 | 7  | 14.8  | P62244          | RPS15A  |
| 55 | -37   | 5.11 | 24  | 31  | 4 | 11 | 14.4  | P53999          | SUB1    |
| 56 | -36   | 5.37 | 29  | 48  | 4 | 7  | 14.8  | P35268          | RPL22   |
| 57 | -35.5 | 4.87 | 26  | 30  | 5 | 7  | 26.7  | P23396          | RPS3    |
| 58 | -35   | 4.32 | 4.5 | 7   | 3 | 7  | 129.5 | P23634          | ATP2B4  |
| 59 | -34.9 | 4.85 | 8.2 | 10  | 5 | 8  | 65.8  | P07948          | LYN     |
| 60 | -34.9 | 5.1  | 28  | 42  | 5 | 9  | 17.7  | P62269          | RPS18   |
| 61 | -34.3 | 4.39 | 29  | 38  | 5 | 5  | 32.4  | O00560          | SDCBP   |
| 62 | -33.9 | 4.83 | 24  | 30  | 4 | 8  | 14.9  | P62829          | RPL23   |
| 63 | -33.5 | 4.04 | 1.3 | 2   | 4 | 7  | 468.7 | P78527          | PRKDC   |
| 64 | -32.8 | 4.86 | 20  | 32  | 5 | 7  | 22.6  | P46781          | RPS9    |
| 65 | -31.9 | 4.7  | 29  | 38  | 3 | 5  | 11.7  | Q9HCY8          | S100A14 |
| 66 | -31.1 | 5.09 | 16  | 25  | 4 | 7  | 27.7  | Q07955          | SFRS1   |
| 67 | -31.1 | 5.39 | 26  | 36  | 3 | 13 | 13.9  | P62807          |         |
| 68 | -31   | 4.91 | 54  | 100 | 5 | 8  | 14.6  | P37108          | SRP14   |

|     |       |      |     |     |   |    |       |                 |          |
|-----|-------|------|-----|-----|---|----|-------|-----------------|----------|
| 69  | -30.4 | 5.2  | 29  | 48  | 3 | 8  | 15.5  | P08708          |          |
| 70  | -30   | 5.42 | 25  | 100 | 5 | 9  | 27.6  | P04156          | PRNP     |
| 71  | -29.6 | 5.32 | 27  | 40  | 4 | 11 | 17.8  | P30050          | RPL12    |
| 72  | -29.5 | 5.07 | 7.1 | 12  | 3 | 6  | 67.7  | O95631          | NTN1     |
| 73  | -29.4 | 4.91 | 6.5 | 11  | 4 | 6  | 122.2 | Q14126          | DSG2     |
| 74  | -28.3 | 4.78 | 16  | 29  | 3 | 5  | 25.2  | P62241          | RPS8     |
| 75  | -27.5 | 4.17 | 5.6 | 8   | 3 | 5  | 104   | O94973          | AP2A2    |
| 76  | -26   | 4.74 | 8.4 | 15  | 4 | 8  | 68.8  | O60716          | CTNND1   |
| 77  | -25.8 | 4.8  | 8.2 | 18  | 4 | 5  | 51.5  | P08621          | SNRP70   |
| 78  | -25.7 | 4.25 | 15  | 23  | 4 | 6  | 49.8  | P68371          | TUBB2C   |
| 79  | -25.2 | 4.65 | 19  | 30  | 4 | 6  | 34.9  | Q96AG4          | LRRCS9   |
| 80  | -24.6 | 4.87 | 13  | 17  | 3 | 7  | 29.6  | P62701          | RPS4X    |
| 81  | -23.9 | 4.91 | 18  | 38  | 3 | 5  | 21.6  | Q07020          | RPL18    |
| 82  | -23.9 | 5.07 | 16  | 50  | 3 | 8  | 18.8  | Q8WVK2          |          |
| 83  | -23.7 | 5.24 | 21  | 38  | 3 | 5  | 13.4  | P60866          | RPS20    |
| 84  | -23.5 | 5.19 | 4.9 | 6   | 3 | 7  | 88.8  | Q14563          | SEMA3A   |
| 85  | -23.5 | 4.5  | 3.9 | 6   | 3 | 4  | 134.2 | P00533          | EGFR     |
| 86  | -23.5 | 4.79 | 6.5 | 15  | 3 | 5  | 54.4  | P50995          | ANXA11   |
| 87  | -23.5 | 4.67 | 21  | 40  | 2 | 5  | 16.2  | P62314          | SNRPD1   |
| 88  | -23.3 | 4.31 | 7.3 | 12  | 4 | 5  | 103.5 | Q13308          | PTK7     |
| 89  | -22.9 | 5.16 | 18  | 29  | 3 | 6  | 19.1  | P62266          | RPS23    |
| 90  | -22.7 | 4.7  | 15  | 24  | 4 | 5  | 24.2  | P26373          | RPL13    |
| 91  | -22.5 | 4.17 | 16  | 19  | 3 | 4  | 23.5  | P51149          | RAB7A    |
| 92  | -22   | 4.67 | 6.1 | 9   | 3 | 5  | 57.9  | Q13425          | SNTB2    |
| 93  | -21.6 | 4.92 | 14  | 23  | 3 | 5  | 30    | P62424          | RPL7A    |
| 94  | -21.6 | 5.21 | 23  | 30  | 2 | 7  | 11.7  | Q9UDP3          | S100A11  |
| 95  | -21.3 | 4.84 | 6   | 8   | 3 | 7  | 61.9  | ENSP00000369323 | NPNT     |
| 96  | -21.1 | 4.55 | 16  | 23  | 3 | 5  | 34.1  | Q99988          | GDF15    |
| 97  | -21.1 | 5.03 | 12  | 33  | 2 | 4  | 23.5  | P84098          | RPL19    |
| 98  | -21.1 | 4.48 | 9.7 | 18  | 2 | 4  | 33.6  | P62995          | SFRS10   |
| 99  | -20.9 | 5.2  | 11  | 29  | 3 | 6  | 28.7  | P62753          | RPS6     |
| 100 | -20.8 | 4.93 | 26  | 48  | 3 | 7  | 14.5  | P62899          | RPL31    |
| 101 | -20.8 | 5.15 | 19  | 24  | 3 | 7  | 19.4  | P35613          | BSG      |
| 102 | -20.7 | 5.11 | 28  | 65  | 3 | 5  | 14    | ENSP00000373730 | H2AFJ    |
| 103 | -20.6 | 4.63 | 4.4 | 6   | 3 | 4  | 83.2  | P08238          | HSP90AB1 |
| 104 | -20.6 | 4.86 | 13  | 27  | 2 | 6  | 23.8  | IPI00555744     |          |
| 105 | -20.5 | 4.67 | 7.9 | 16  | 2 | 6  | 43.4  | Q6NZI2          | PTRF     |
| 106 | -20.3 | 4.04 | 1.6 | 2   | 3 | 5  | 394.2 | P46939          | UTRN     |
| 107 | -20.1 | 4.95 | 6.8 | 11  | 3 | 5  | 47.7  | P36578          | RPL4     |
| 108 | -19.6 | 4.3  | 4.1 | 7   | 2 | 4  | 88    | P18084          | ITGB5    |
| 109 | -19.4 | 4.82 | 19  | 38  | 2 | 6  | 15.1  | P62847          | RPS24    |
| 110 | -19.1 | 5.54 | 12  | 18  | 3 | 7  | 28    | P62917          | RPL8     |
| 111 | -18.7 | 4.77 | 18  | 36  | 3 | 5  | 15.8  | P61353          | RPL27    |

|     |       |      |     |    |   |   |      |        |         |
|-----|-------|------|-----|----|---|---|------|--------|---------|
| 112 | -18.6 | 4.9  | 26  | 37 | 2 | 4 | 11.2 | P60903 | S100A10 |
| 113 | -17.8 | 4.16 | 5.4 | 6  | 2 | 5 | 63.1 | P06744 | GPI     |
| 114 | -17.5 | 4.09 | 4   | 6  | 2 | 4 | 87.3 | Q9NR30 | DDX21   |
| 115 | -17.4 | 4.31 | 5.3 | 11 | 2 | 3 | 51.4 | O95232 |         |
| 116 | -17.1 | 5.09 | 5.1 | 16 | 2 | 4 | 55   | Q01650 | SLC7A5  |
| 117 | -17   | 5.1  | 7   | 14 | 3 | 5 | 33.2 | Q9NWB6 |         |
| 118 | -17   | 4.54 | 4.2 | 8  | 3 | 5 | 99   | P11387 | TOP1    |
| 119 | -16.8 | 4.5  | 10  | 14 | 2 | 4 | 22.5 | P61026 | RAB10   |
| 120 | -16.6 | 4.88 | 11  | 26 | 2 | 5 | 20.9 | P07305 | H1F0    |
| 121 | -16.5 | 4.9  | 12  | 25 | 2 | 5 | 17.8 | P83731 | RPL24   |
| 122 | -16.3 | 5.47 | 26  | 33 | 2 | 6 | 9.5  | P42677 |         |
| 123 | -15   | 4.56 | 9.8 | 14 | 3 | 4 | 56   | Q9P258 | RCC2    |
| 124 | -14.8 | 4.65 | 6.9 | 10 | 2 | 3 | 39.3 | P56706 | WNT7B   |
| 125 | -14.5 | 4.8  | 12  | 24 | 2 | 4 | 23   | O15347 | HMGB3   |
| 126 | -14.4 | 4.35 | 3.7 | 9  | 2 | 3 | 90.9 | P12830 | CDH1    |
| 127 | -14.2 | 4.65 | 8.2 | 14 | 2 | 5 | 40.1 | P39023 | RPL3    |
| 128 | -14   | 4.92 | 6.9 | 9  | 2 | 3 | 33.6 | P07910 |         |
| 129 | -13.9 | 5.67 | 2.1 | 3  | 2 | 6 | 70   | P00734 | F2      |
| 130 | -13.8 | 4.58 | 6.9 | 14 | 2 | 3 | 28.9 | Q8N9E0 | FAM133A |
| 131 | -13.4 | 4.65 | 14  | 24 | 2 | 4 | 22.2 | O75494 | FUSIP1  |
| 132 | -13.3 | 5.05 | 9.7 | 12 | 2 | 9 | 12.6 | P62888 | RPL30   |
| 133 | -12.8 | 4.87 | 35  | 41 | 2 | 4 | 8    | Q9UBI6 | GNG12   |
| 134 | -12.2 | 3.94 | 9.3 | 11 | 2 | 2 | 37.5 | Q08431 | MFGE8   |
| 135 | -12.2 | 4.64 | 9.4 | 17 | 2 | 3 | 22.5 | Q92522 | H1FX    |
| 136 | -12.1 | 4.32 | 13  | 16 | 2 | 4 | 19.9 | P46783 | RPS10   |
| 137 | -11.8 | 4.07 | 8.8 | 15 | 2 | 2 | 47.5 | Q8NBZ7 | UXS1    |
| 138 | -11.7 | 3.75 | 6.3 | 13 | 2 | 3 | 54.9 | O76021 | RSL1D1  |
| 139 | -11.4 | 4.5  | 27  | 52 | 2 | 4 | 10.8 | P62304 | SNRPE   |
| 140 | -11.4 | 4.96 | 16  | 54 | 2 | 7 | 14.5 | P42766 | RPL35   |
| 141 | -11.3 | 4.08 | 7.6 | 9  | 2 | 3 | 42.6 | P39748 | FEN1    |
| 142 | -11.2 | 4.52 | 27  | 60 | 2 | 3 | 10.3 | P61513 | RPL37A  |
| 143 | -11.1 | 3.89 | 8.2 | 10 | 2 | 2 | 35.5 | P27695 | APEX1   |
| 144 | -10.9 | 4.81 | 5.3 | 12 | 2 | 4 | 35   | P10646 | TFPI    |
| 145 | -10.9 | 3.9  | 6.4 | 9  | 2 | 4 | 46.8 | P05455 | SSB     |
| 146 | -10.6 | 3.83 | 11  | 12 | 2 | 3 | 32.9 | Q86W42 | THOC6   |
| 147 | -10.5 | 3.6  | 2.7 | 4  | 2 | 3 | 70.7 | Q9UHB9 | SRP68   |
| 148 | -10.4 | 4.22 | 7   | 11 | 2 | 4 | 40.4 | P04899 | GNAI2   |
| 149 | -10.4 | 5.08 | 14  | 20 | 2 | 3 | 19.7 | Q01081 | U2AF1   |
| 150 | -9.8  | 4.76 | 14  | 32 | 2 | 3 | 13.3 | P49207 | RPL34   |
| 151 | -9.6  | 4.59 | 13  | 19 | 2 | 3 | 34.2 | Q9UQ35 | SRRM2   |
| 152 | -9.6  | 4.48 | 4.7 | 7  | 2 | 3 | 48   | P35659 | DEK     |
| 153 | -9.5  | 5.07 | 3.3 | 5  | 2 | 6 | 37.3 | O60911 | CTSL2   |
| 154 | -9.5  | 5.54 | 17  | 42 | 2 | 4 | 6.9  | Q9NX55 | SERF2   |

|     |      |      |     |    |   |   |       |                 |        |
|-----|------|------|-----|----|---|---|-------|-----------------|--------|
| 155 | -9.1 | 4.02 | 15  | 31 | 2 | 2 | 16.6  | P46776          | RPL27A |
| 156 | -9.1 | 3.4  | 2.2 | 4  | 2 | 3 | 104.5 | P63010          | AP2B1  |
| 157 | -8.8 | 4.3  | 5.1 | 8  | 2 | 3 | 34.3  | P46777          | RPL5   |
| 158 | -8.3 | 4.1  | 7.5 | 20 | 2 | 2 | 14.4  | P35544          | FAU    |
| 159 | -8   | 5.06 | 12  | 22 | 2 | 3 | 12.9  | ENSP00000384244 |        |
| 160 | -8   | 4.09 | 5.9 | 9  | 2 | 2 | 48.6  | ENSP00000338788 | ZC3H15 |
| 161 | -7   | 5.2  | 7.6 | 12 | 2 | 6 | 13.8  | ENSP00000345317 |        |
| 162 | -6.9 | 4.05 | 6.5 | 9  | 2 | 2 | 31.7  | P17936          | IGFBP3 |
| 163 | -6.8 | 4.64 | 10  | 15 | 2 | 2 | 15.3  | P84243          |        |
| 164 | -6.6 | 4.17 | 11  | 15 | 2 | 2 | 16.4  | P62249          | RPS16  |
| 165 | -6.3 | 4.23 | 6.6 | 8  | 2 | 2 | 36.7  | P00338          | LDHA   |

**Figure S2.**

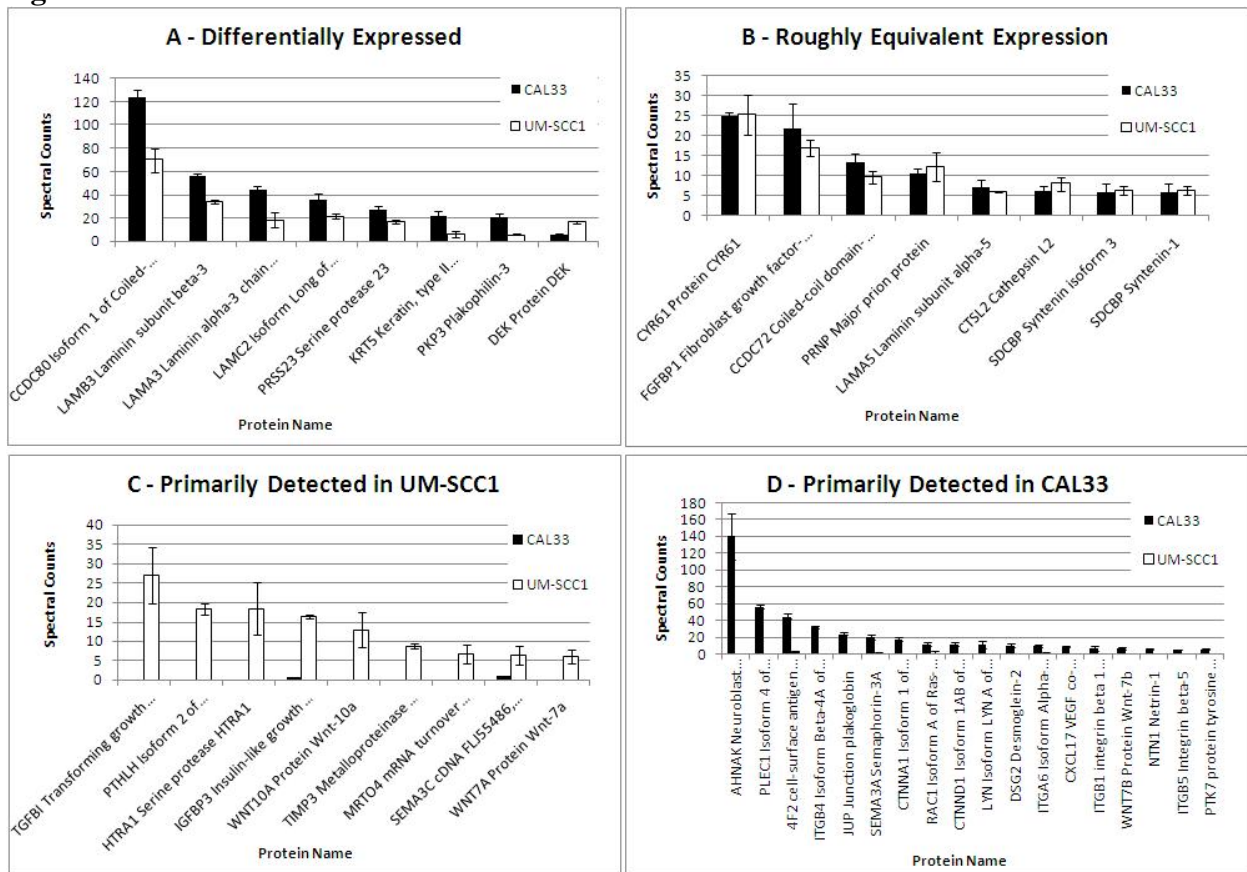

**Order of Supplemental Information is as presented.**
